# Supplementary material
Source: MDPI journal article supplement (https://www.mdpi.com/2076-3417/13/20/11338)
Supplement: s1 [file s1]

Supplementary: Experimental stress analysis results by components

| Part Code:<br>RDM165-A-004 |             | IN-GARAGE<br>TESTS                        |                              | ROAD TESTS                    |                              |                               |                              |                               |                              |                               |                              |                               |                              |                               |                              |                               |                              |                               |                              |                               |                              |
|----------------------------|-------------|-------------------------------------------|------------------------------|-------------------------------|------------------------------|-------------------------------|------------------------------|-------------------------------|------------------------------|-------------------------------|------------------------------|-------------------------------|------------------------------|-------------------------------|------------------------------|-------------------------------|------------------------------|-------------------------------|------------------------------|-------------------------------|------------------------------|
|                            |             |                                           |                              | ASPHALT ROAD                  |                              |                               |                              |                               |                              | DIRT ROAD                     |                              |                               |                              |                               |                              | IN-FIELD ROAD                 |                              |                               |                              |                               |                              |
|                            |             | Transportation<br>position Static Linkage |                              | Tractor Speed-01              |                              | Tractor Speed-02              |                              | Tractor Speed-03              |                              | Tractor Speed-01              |                              | Tractor Speed-02              |                              | Tractor Speed-03              |                              | Tractor Speed-01              |                              | Tractor Speed-02              |                              | Tractor Speed-03              |                              |
| Strain-Gauge<br>No         | Test Values | Equivalent<br>Stress<br>(MPa)             | Standard<br>Deviation<br>(±) | Equivalent<br>Stress<br>(MPa) | Standard<br>Deviation<br>(±) | Equivalent<br>Stress<br>(MPa) | Standard<br>Deviation<br>(±) | Equivalent<br>Stress<br>(MPa) | Standard<br>Deviation<br>(±) | Equivalent<br>Stress<br>(MPa) | Standard<br>Deviation<br>(±) | Equivalent<br>Stress<br>(MPa) | Standard<br>Deviation<br>(±) | Equivalent<br>Stress<br>(MPa) | Standard<br>Deviation<br>(±) | Equivalent<br>Stress<br>(MPa) | Standard<br>Deviation<br>(±) | Equivalent<br>Stress<br>(MPa) | Standard<br>Deviation<br>(±) | Equivalent<br>Stress<br>(MPa) | Standard<br>Deviation<br>(±) |
| SG-01                      | Max.        | 16.150                                    | 0.365                        | 31.980                        | 1.738                        | 34.287                        | 1.242                        | 36.538                        | 4.645                        | 34.993                        | 1.018                        | 37.614                        | 3.884                        | 45.865                        | 10.506                       | 46.442                        | 3.196                        | 48.800                        | 1.631                        | 45.194                        | 3.999                        |
|                            | Min.        | 14.620                                    | 0.156                        | 14.203                        | 2.573                        | 18.193                        | 0.561                        | 10.741                        | 2.493                        | 17.035                        | 2.938                        | 15.386                        | 1.674                        | 10.689                        | 3.563                        | 18.708                        | 3.199                        | 13.980                        | 1.013                        | 14.374                        | 0.328                        |
|                            | Average     | 15.355                                    | 0.282                        | 22.613                        | 0.197                        | 23.820                        | 0.376                        | 23.124                        | 1.678                        | 25.405                        | 0.993                        | 25.784                        | 0.352                        | 25.743                        | 0.646                        | 27.161                        | 2.369                        | 27.854                        | 2.549                        | 27.291                        | 1.467                        |
| SG-02                      | Max.        | 9.723                                     | 0.080                        | 19.358                        | 1.351                        | 18.651                        | 1.106                        | 21.535                        | 2.223                        | 19.687                        | 1.078                        | 21.203                        | 0.710                        | 22.675                        | 5.090                        | 20.932                        | 4.331                        | 25.441                        | 1.146                        | 20.529                        | 2.114                        |
|                            | Min.        | 8.798                                     | 0.171                        | 9.627                         | 1.462                        | 10.074                        | 0.248                        | 6.964                         | 1.246                        | 10.216                        | 1.400                        | 9.962                         | 0.583                        | 7.154                         | 2.471                        | 9.153                         | 1.411                        | 10.559                        | 0.914                        | 10.884                        | 0.615                        |
|                            | Average     | 9.320                                     | 0.091                        | 14.720                        | 0.254                        | 14.299                        | 0.056                        | 14.612                        | 0.219                        | 14.878                        | 0.109                        | 15.342                        | 0.014                        | 15.534                        | 0.157                        | 11.827                        | 0.443                        | 15.888                        | 0.648                        | 14.210                        | 0.119                        |
| SG-03                      | Max.        | 10.215                                    | 0.032                        | 27.093                        | 1.525                        | 25.879                        | 1.382                        | 31.183                        | 2.757                        | 28.018                        | 1.825                        | 30.763                        | 0.926                        | 37.144                        | 5.934                        | 40.040                        | 9.819                        | 45.765                        | 5.204                        | 40.261                        | 2.453                        |
|                            | Min.        | 8.851                                     | 0.360                        | 14.714                        | 1.756                        | 14.992                        | 0.283                        | 11.877                        | 1.551                        | 15.460                        | 1.852                        | 15.159                        | 0.794                        | 12.048                        | 3.177                        | 22.101                        | 3.176                        | 20.529                        | 3.114                        | 21.594                        | 1.047                        |
|                            | Average     | 9.708                                     | 0.124                        | 21.031                        | 0.337                        | 20.256                        | 0.078                        | 21.350                        | 0.193                        | 21.328                        | 0.299                        | 22.155                        | 0.073                        | 22.478                        | 0.352                        | 27.662                        | 0.218                        | 28.449                        | 0.176                        | 27.683                        | 0.074                        |

Max. equivalent stress value

| Part Code:<br>RDM165-B-003 |             | IN-GARAGE<br>TESTS                        |                              | ROAD TESTS                    |                              |                               |                              |                               |                              |                               |                              |                               |                              |                               |                              |                               |                              |                               |                              |                               |                              |
|----------------------------|-------------|-------------------------------------------|------------------------------|-------------------------------|------------------------------|-------------------------------|------------------------------|-------------------------------|------------------------------|-------------------------------|------------------------------|-------------------------------|------------------------------|-------------------------------|------------------------------|-------------------------------|------------------------------|-------------------------------|------------------------------|-------------------------------|------------------------------|
|                            |             |                                           |                              | ASPHALT ROAD                  |                              |                               |                              |                               |                              | DIRT ROAD                     |                              |                               |                              |                               |                              | IN-FIELD ROAD                 |                              |                               |                              |                               |                              |
|                            |             | Transportation<br>position Static Linkage |                              | Tractor Speed-01              |                              | Tractor Speed-02              |                              | Tractor Speed-03              |                              | Tractor Speed-01              |                              | Tractor Speed-02              |                              | Tractor Speed-03              |                              | Tractor Speed-01              |                              | Tractor Speed-02              |                              | Tractor Speed-03              |                              |
| Strain-Gauge<br>No         | Test Values | Equivalent<br>Stress<br>(MPa)             | Standard<br>Deviation<br>(±) | Equivalent<br>Stress<br>(MPa) | Standard<br>Deviation<br>(±) | Equivalent<br>Stress<br>(MPa) | Standard<br>Deviation<br>(±) | Equivalent<br>Stress<br>(MPa) | Standard<br>Deviation<br>(±) | Equivalent<br>Stress<br>(MPa) | Standard<br>Deviation<br>(±) | Equivalent<br>Stress<br>(MPa) | Standard<br>Deviation<br>(±) | Equivalent<br>Stress<br>(MPa) | Standard<br>Deviation<br>(±) | Equivalent<br>Stress<br>(MPa) | Standard<br>Deviation<br>(±) | Equivalent<br>Stress<br>(MPa) | Standard<br>Deviation<br>(±) | Equivalent<br>Stress<br>(MPa) | Standard<br>Deviation<br>(±) |
| SG-01                      | Max.        | 8.101                                     | 0.160                        | 13.098                        | 3.505                        | 13.545                        | 2.271                        | 14.680                        | 2.941                        | 14.561                        | 2.067                        | 15.490                        | 3.086                        | 15.617                        | 0.718                        | 23.626                        | 1.032                        | 24.584                        | 3.250                        | 26.234                        | 2.714                        |
|                            | Min.        | 7.019                                     | 0.137                        | 6.949                         | 2.593                        | 5.802                         | 0.815                        | 8.420                         | 0.965                        | 5.875                         | 0.851                        | 5.951                         | 1.185                        | 5.130                         | 0.265                        | 13.756                        | 2.847                        | 16.603                        | 0.295                        | 14.445                        | 0.998                        |
|                            | Average     | 7.464                                     | 0.145                        | 10.405                        | 1.146                        | 9.563                         | 0.097                        | 11.570                        | 0.527                        | 10.288                        | 0.071                        | 10.423                        | 0.128                        | 9.932                         | 0.142                        | 20.395                        | 0.194                        | 20.263                        | 0.079                        | 20.424                        | 0.202                        |
| SG-02                      | Max.        | 9.377                                     | 0.109                        | 17.959                        | 3.825                        | 15.489                        | 0.831                        | 20.034                        | 2.136                        | 19.620                        | 0.755                        | 21.245                        | 2.898                        | 20.161                        | 1.151                        | 31.753                        | 2.588                        | 29.293                        | 0.623                        | 31.887                        | 1.875                        |
|                            | Min.        | 8.791                                     | 0.024                        | 10.117                        | 0.111                        | 10.058                        | 0.012                        | 10.388                        | 0.153                        | 11.006                        | 0.248                        | 11.397                        | 0.863                        | 11.535                        | 0.395                        | 22.671                        | 1.395                        | 22.768                        | 0.889                        | 21.956                        | 0.731                        |
|                            | Average     | 9.078                                     | 0.080                        | 11.879                        | 0.523                        | 11.395                        | 0.049                        | 12.752                        | 0.218                        | 14.343                        | 0.203                        | 14.879                        | 0.244                        | 15.082                        | 0.154                        | 26.443                        | 0.070                        | 26.540                        | 0.077                        | 26.576                        | 0.102                        |
| SG-03                      | Max.        | 11.573                                    | 0.120                        | 28.920                        | 0.240                        | 28.698                        | 0.507                        | 29.578                        | 0.642                        | 40.478                        | 0.312                        | 40.856                        | 0.385                        | 40.518                        | 0.103                        | 41.621                        | 1.298                        | 46.331                        | 2.033                        | 42.841                        | 0.520                        |
|                            | Min.        | 11.060                                    | 0.021                        | 26.351                        | 0.173                        | 26.620                        | 0.121                        | 26.522                        | 0.426                        | 38.104                        | 0.171                        | 38.174                        | 0.228                        | 38.299                        | 0.153                        | 36.993                        | 0.623                        | 35.293                        | 0.695                        | 35.698                        | 1.246                        |
|                            | Average     | 11.241                                    | 0.031                        | 27.371                        | 0.028                        | 27.480                        | 0.233                        | 28.013                        | 0.089                        | 39.091                        | 0.113                        | 38.335                        | 0.076                        | 39.278                        | 0.017                        | 38.134                        | 0.025                        | 39.530                        | 0.257                        | 38.261                        | 0.045                        |
| SG-04                      | Max.        | 14.882                                    | 0.022                        | 41.222                        | 0.726                        | 43.573                        | 1.460                        | 42.997                        | 3.537                        | 45.581                        | 1.415                        | 44.645                        | 1.323                        | 45.714                        | 3.454                        | 46.365                        | 0.166                        | 44.226                        | 0.806                        | 46.481                        | 3.143                        |
|                            | Min.        | 13.150                                    | 0.341                        | 37.107                        | 0.148                        | 36.415                        | 0.132                        | 36.213                        | 0.174                        | 32.783                        | 1.102                        | 33.689                        | 1.010                        | 32.130                        | 1.393                        | 35.251                        | 0.292                        | 35.403                        | 0.954                        | 35.101                        | 1.747                        |
|                            | Average     | 14.333                                    | 0.086                        | 38.242                        | 0.088                        | 38.651                        | 0.166                        | 38.505                        | 1.440                        | 38.585                        | 0.997                        | 38.836                        | 0.143                        | 38.886                        | 0.429                        | 39.390                        | 0.177                        | 39.394                        | 0.102                        | 39.615                        | 0.100                        |
| SG-05                      | Max.        | 14.768                                    | 0.167                        | 26.439                        | 3.300                        | 25.867                        | 0.919                        | 29.205                        | 3.506                        | 25.972                        | 2.403                        | 26.003                        | 1.744                        | 29.211                        | 5.055                        | 60.894                        | 0.911                        | 61.798                        | 4.549                        | 62.010                        | 0.627                        |
|                            | Min.        | 13.740                                    | 0.225                        | 7.557                         | 2.241                        | 7.524                         | 1.734                        | 4.624                         | 2.748                        | 5.457                         | 2.537                        | 7.400                         | 1.990                        | 3.462                         | 3.207                        | 45.285                        | 2.515                        | 47.936                        | 2.353                        | 46.581                        | 1.509                        |
|                            | Average     | 14.285                                    | 0.246                        | 16.476                        | 0.091                        | 16.057                        | 0.116                        | 16.321                        | 0.401                        | 15.609                        | 0.068                        | 15.429                        | 0.127                        | 15.492                        | 0.141                        | 54.862                        | 0.213                        | 54.463                        | 0.155                        | 55.023                        | 0.321                        |
| SG-06                      | Max.        | 14.295                                    | 0.239                        | 20.280                        | 1.785                        | 21.705                        | 4.085                        | 23.782                        | 1.291                        | 21.253                        | 1.266                        | 21.414                        | 0.853                        | 25.019                        | 5.155                        | 26.328                        | 1.934                        | 29.424                        | 6.422                        | 31.743                        | 4.024                        |
|                            | Min.        | 13.022                                    | 0.152                        | 6.023                         | 2.763                        | 7.232                         | 1.565                        | 4.578                         | 2.890                        | 6.286                         | 3.096                        | 8.219                         | 0.645                        | 5.635                         | 2.345                        | 4.017                         | 3.153                        | 7.719                         | 3.041                        | 8.592                         | 5.673                        |
|                            | Average     | 13.605                                    | 0.024                        | 13.601                        | 0.058                        | 13.458                        | 0.241                        | 13.878                        | 0.772                        | 14.281                        | 0.167                        | 14.462                        | 0.121                        | 14.678                        | 0.204                        | 17.483                        | 0.522                        | 18.038                        | 0.182                        | 18.870                        | 1.287                        |
| SG-07                      | Max.        | 9.253                                     | 1.000                        | 38.705                        | 1.214                        | 38.052                        | 0.854                        | 38.682                        | 1.372                        | 38.825                        | 0.659                        | 38.455                        | 1.070                        | 38.895                        | 1.333                        | 48.537                        | 1.392                        | 47.336                        | 1.015                        | 47.638                        | 0.584                        |
|                            | Min.        | 6.321                                     | 0.453                        | 32.503                        | 1.039                        | 31.534                        | 0.559                        | 33.173                        | 0.630                        | 33.729                        | 0.235                        | 32.538                        | 0.462                        | 33.068                        | 0.347                        | 41.482                        | 0.726                        | 37.960                        | 0.641                        | 39.222                        | 1.523                        |
|                            | Average     | 7.368                                     | 0.653                        | 35.489                        | 0.858                        | 34.903                        | 0.489                        | 35.820                        | 0.616                        | 36.214                        | 0.325                        | 34.697                        | 0.124                        | 35.621                        | 0.098                        | 44.188                        | 0.483                        | 43.440                        | 0.258                        | 43.367                        | 0.216                        |

Max. equivalent stress value

| Part Code:<br>RDM165-B-004 |             | IN-GARAGE<br>TESTS                        |                              | ROAD TESTS                    |                              |                               |                              |                               |                              |                               |                              |                               |                              |                               |                              |                               |                              |                               |                              |                               |                              |
|----------------------------|-------------|-------------------------------------------|------------------------------|-------------------------------|------------------------------|-------------------------------|------------------------------|-------------------------------|------------------------------|-------------------------------|------------------------------|-------------------------------|------------------------------|-------------------------------|------------------------------|-------------------------------|------------------------------|-------------------------------|------------------------------|-------------------------------|------------------------------|
|                            |             |                                           |                              | ASPHALT ROAD                  |                              |                               |                              |                               |                              | DIRT ROAD                     |                              |                               |                              |                               |                              | IN-FIELD ROAD                 |                              |                               |                              |                               |                              |
|                            |             | Transportation<br>position Static Linkage |                              | Tractor Speed-01              |                              | Tractor Speed-02              |                              | Tractor Speed-03              |                              | Tractor Speed-01              |                              | Tractor Speed-02              |                              | Tractor Speed-03              |                              | Tractor Speed-01              |                              | Tractor Speed-02              |                              | Tractor Speed-03              |                              |
| Strain-Gauge<br>No         | Test Values | Equivalent<br>Stress<br>(MPa)             | Standard<br>Deviation<br>(±) | Equivalent<br>Stress<br>(MPa) | Standard<br>Deviation<br>(±) | Equivalent<br>Stress<br>(MPa) | Standard<br>Deviation<br>(±) | Equivalent<br>Stress<br>(MPa) | Standard<br>Deviation<br>(±) | Equivalent<br>Stress<br>(MPa) | Standard<br>Deviation<br>(±) | Equivalent<br>Stress<br>(MPa) | Standard<br>Deviation<br>(±) | Equivalent<br>Stress<br>(MPa) | Standard<br>Deviation<br>(±) | Equivalent<br>Stress<br>(MPa) | Standard<br>Deviation<br>(±) | Equivalent<br>Stress<br>(MPa) | Standard<br>Deviation<br>(±) | Equivalent<br>Stress<br>(MPa) | Standard<br>Deviation<br>(±) |
| SG-01                      | Max.        | 17.781                                    | 5.100                        | 18.671                        | 1.242                        | 19.123                        | 0.590                        | 20.475                        | 0.162                        | 18.725                        | 0.265                        | 19.721                        | 1.074                        | 19.917                        | 1.809                        | 34.978                        | 1.460                        | 31.498                        | 0.048                        | 33.183                        | 2.393                        |
|                            | Min.        | 1.406                                     | 2.975                        | 2.795                         | 0.390                        | 10.510                        | 0.073                        | 5.294                         | 0.096                        | 3.089                         | 0.329                        | 13.472                        | 0.760                        | 2.700                         | 0.597                        | 29.704                        | 0.423                        | 29.204                        | 0.102                        | 25.880                        | 0.325                        |
|                            | Average     | 10.944                                    | 4.901                        | 15.461                        | 0.263                        | 15.220                        | 0.226                        | 16.600                        | 0.088                        | 15.611                        | 0.167                        | 15.851                        | 0.127                        | 15.988                        | 0.092                        | 31.446                        | 0.398                        | 30.425                        | 0.170                        | 29.411                        | 0.171                        |
| SG-02                      | Max.        | 16.797                                    | 4.817                        | 27.261                        | 5.744                        | 31.238                        | 4.277                        | 37.267                        | 2.960                        | 47.406                        | 4.398                        | 48.949                        | 1.799                        | 47.377                        | 9.651                        | 54.250                        | 3.581                        | 54.520                        | 6.258                        | 56.979                        | 3.565                        |
|                            | Min.        | 9.556                                     | 4.054                        | 13.758                        | 7.059                        | 2.827                         | 10.967                       | 17.600                        | 1.761                        | 14.997                        | 7.156                        | 8.250                         | 9.390                        | 3.493                         | 24.661                       | 14.010                        | 3.058                        | 15.707                        | 3.286                        | 22.964                        | 4.893                        |
|                            | Average     | 10.915                                    | 4.199                        | 23.083                        | 2.319                        | 27.108                        | 2.654                        | 24.914                        | 0.207                        | 35.111                        | 0.119                        | 34.315                        | 0.615                        | 30.444                        | 3.267                        | 31.346                        | 0.913                        | 37.907                        | 0.776                        | 38.421                        | 0.279                        |
| SG-03                      | Max.        | 11.734                                    | 1.222                        | 32.305                        | 2.990                        | 36.693                        | 1.246                        | 34.362                        | 3.537                        | 38.573                        | 2.651                        | 37.924                        | 5.778                        | 35.142                        | 20.678                       | 37.045                        | 1.416                        | 38.750                        | 1.065                        | 37.657                        | 0.509                        |
|                            | Min.        | 7.686                                     | 0.908                        | 9.361                         | 3.733                        | 21.224                        | 3.769                        | 15.792                        | 2.593                        | 13.084                        | 5.256                        | 16.616                        | 4.882                        | 12.666                        | 4.505                        | 33.016                        | 2.588                        | 22.997                        | 4.644                        | 25.010                        | 3.091                        |
|                            | Average     | 9.131                                     | 0.817                        | 20.798                        | 1.204                        | 29.325                        | 0.279                        | 27.935                        | 1.015                        | 31.201                        | 0.281                        | 26.767                        | 0.174                        | 25.936                        | 0.292                        | 31.370                        | 0.101                        | 32.714                        | 0.365                        | 31.585                        | 0.606                        |
| SG-04                      | Max.        | 15.136                                    | 2.789                        | 37.679                        | 1.824                        | 37.785                        | 3.156                        | 36.126                        | 2.004                        | 35.087                        | 2.060                        | 34.709                        | 2.468                        | 36.244                        | 2.633                        | 45.814                        | 1.664                        | 47.566                        | 1.114                        | 45.875                        | 0.835                        |
|                            | Min.        | 8.575                                     | 2.367                        | 32.228                        | 1.675                        | 30.501                        | 0.700                        | 38.329                        | 0.969                        | 28.032                        | 0.608                        | 35.856                        | 1.984                        | 23.607                        | 3.880                        | 39.883                        | 1.957                        | 38.504                        | 1.356                        | 38.471                        | 1.344                        |
|                            | Average     | 11.137                                    | 2.472                        | 34.982                        | 0.787                        | 33.451                        | 0.687                        | 31.782                        | 0.711                        | 31.377                        | 0.214                        | 30.227                        | 0.096                        | 29.658                        | 0.386                        | 43.746                        | 1.391                        | 44.016                        | 1.384                        | 42.697                        | 0.109                        |
| SG-05                      | Max.        | 17.483                                    | 0.313                        | 18.664                        | 2.156                        | 19.480                        | 1.251                        | 26.061                        | 3.471                        | 21.361                        | 3.092                        | 26.218                        | 2.682                        | 26.717                        | 4.374                        | 46.213                        | 2.192                        | 46.525                        | 0.579                        | 48.999                        | 1.214                        |
|                            | Min.        | 15.463                                    | 0.419                        | 10.412                        | 0.953                        | 9.461                         | 1.329                        | 8.768                         | 1.191                        | 7.465                         | 0.372                        | 5.819                         | 0.802                        | 4.394                         | 0.789                        | 37.650                        | 1.993                        | 37.157                        | 0.692                        | 33.933                        | 1.644                        |
|                            | Average     | 16.499                                    | 0.283                        | 14.007                        | 0.198                        | 13.555                        | 0.519                        | 16.143                        | 1.258                        | 12.989                        | 0.862                        | 13.071                        | 0.325                        | 13.320                        | 0.445                        | 42.600                        | 0.734                        | 43.362                        | 0.122                        | 44.476                        | 0.035                        |
| SG-06                      | Max.        | 16.285                                    | 0.310                        | 15.005                        | 0.849                        | 14.961                        | 0.164                        | 15.087                        | 1.573                        | 14.226                        | 1.935                        | 16.638                        | 1.423                        | 17.306                        | 3.470                        | 44.636                        | 3.480                        | 45.619                        | 1.783                        | 46.972                        | 2.761                        |
|                            | Min.        | 14.067                                    | 0.328                        | 10.945                        | 0.445                        | 10.034                        | 0.975                        | 10.360                        | 0.711                        | 8.803                         | 0.213                        | 7.833                         | 0.683                        | 6.630                         | 0.241                        | 31.277                        | 2.794                        | 30.191                        | 0.324                        | 27.845                        | 1.276                        |
|                            | Average     | 15.140                                    | 0.256                        | 12.623                        | 0.073                        | 11.991                        | 0.484                        | 13.330                        | 0.610                        | 10.866                        | 0.774                        | 10.546                        | 0.299                        | 9.911                         | 0.383                        | 38.072                        | 0.997                        | 38.378                        | 0.064                        | 39.909                        | 0.183                        |
| SG-07                      | Max.        | 14.855                                    | 4.000                        | 24.237                        | 2.195                        | 28.002                        | 3.260                        | 22.261                        | 1.832                        | 21.143                        | 1.062                        | 21.111                        | 0.856                        | 22.431                        | 1.537                        | 40.480                        | 1.558                        | 41.425                        | 1.210                        | 39.978                        | 0.845                        |
|                            | Min.        | 6.463                                     | 3.780                        | 15.382                        | 1.526                        | 13.573                        | 1.402                        | 15.415                        | 0.516                        | 11.416                        | 0.242                        | 11.259                        | 0.732                        | 9.719                         | 2.063                        | 34.920                        | 1.009                        | 32.590                        | 2.442                        | 34.363                        | 1.126                        |
|                            | Average     | 11.559                                    | 3.961                        | 19.599                        | 0.767                        | 19.653                        | 0.376                        | 17.905                        | 0.535                        | 16.028                        | 0.265                        | 16.596                        | 0.144                        | 14.856                        | 0.228                        | 37.361                        | 1.015                        | 37.881                        | 0.972                        | 37.259                        | 0.040                        |
